# Supplementary material for: Relationship between Running Spatiotemporal Kinematics and Muscle Performance in Well-Trained Youth Female Athletes. A Cross-Sectional Study
Source: MDPI journal article supplement (doi:10.3390/ijerph18168869), 2021-08-23
Supplement: s1 [file s1]

**Table S1.** Categorization of effect size [58].

| Small |       | Moderate |       | Large |       | Very large |       |
|-------|-------|----------|-------|-------|-------|------------|-------|
| $R^2$ | $r$   | $R^2$    | $r$   | $R^2$ | $r$   | $R^2$      | $r$   |
| <     | <     | 0.040    | 0.200 | 0.125 | 0.354 | 0.265      | 0.514 |
| 0.002 | 0.050 | 0.059    | 0.243 | 0.168 | 0.410 | 0.267      | 0.545 |
| 0.010 | 0.100 | 0.083    | 0.287 | 0.200 | 0.447 | 0.329      | 0.573 |
| 0.022 | 0.148 | 0.096    | 0.309 | 0.232 | 0.482 | 0.360      | 0.600 |
| 0.030 | 0.172 | 0.109    | 0.330 | 0.250 | 0.500 | >          | >     |

$R^2$  = coefficient of determination R square;  $r$  = correlation coefficient.
